# Supplementary material for: Industry Payments Received by Residents During Training
Source: PubMed Central journal article supplement (PMC10580108; doi:10.1001/jamanetworkopen.2023.37904), 2023-10-16
Supplement: jamanetwopen-e2337904-s001.pdf [file jamanetwopen-e2337904-s001.pdf]

## Supplemental Online Content

Hogan S, Yamazaki K, Jing Y, Trock B, Han M, Holmboe E. Industry payments received by residents during training. *JAMA Netw Open*. 2023;6(10):e2337904. doi:10.1001/jamanetworkopen.2023.37904

**eTable 1.** Types of Industry Largess Received by Residents in 6 Medical Specialties, 2020 to 2021

**eTable 2.** Types of Industry Largess Received by Residents in all Medical Specialties, 2020 to 2021

**eTable 3.** Definitions of Payment Types

This supplemental material has been provided by the authors to give readers additional information about their work.

**eTable 1. Types of Industry Largess Received by Residents in 6 Medical Specialties, 2020 to 2021**

|                     | Count of payments |           |                    |       |                |                                                                                                                                                    |      |                    |           |               |                                         |                                                                                     |                  |
|---------------------|-------------------|-----------|--------------------|-------|----------------|----------------------------------------------------------------------------------------------------------------------------------------------------|------|--------------------|-----------|---------------|-----------------------------------------|-------------------------------------------------------------------------------------|------------------|
| Specialty           | Food and Beverage | Education | Travel and Lodging | Grant | Consulting Fee | Compensation for services other than consulting, including serving as faculty or as a speaker at a venue other than a continuing education program | Gift | Royalty or License | Honoraria | Entertainment | Long term medical supply or device loan | Compensation for serving as faculty or as a speaker for a medical education program | Debt forgiveness |
| Orthopaedic surgery | 5815              | 1675      | 397                | 36    | 7              | 7                                                                                                                                                  |      | 4                  |           |               |                                         | 1                                                                                   |                  |
| Internal medicine   | 7293              | 44        | 11                 | 25    | 1              | 2                                                                                                                                                  | 17   |                    |           |               |                                         |                                                                                     |                  |

|                                                    |                   |             |                  |                  |             |             |                  |             |             |             |             |             |             |
|----------------------------------------------------|-------------------|-------------|------------------|------------------|-------------|-------------|------------------|-------------|-------------|-------------|-------------|-------------|-------------|
| <b>Famil<br/>y<br/>medici<br/>ne</b>               | <b>4631</b>       | <b>2</b>    | <b>3</b>         | <b>3</b>         | <b>4</b>    | <b>3</b>    | <b>1</b>         |             |             |             | <b>1</b>    |             |             |
| <b>Surge<br/>ry</b>                                | <b>2858</b>       | <b>185</b>  | <b>99</b>        | <b>18</b>        | <b>7</b>    | <b>7</b>    | <b>1</b>         |             |             |             |             |             |             |
| <b>Urolo<br/>gy</b>                                | <b>2136</b>       | <b>54</b>   | <b>18</b>        | <b>20</b>        |             | <b>2</b>    |                  |             |             |             |             |             |             |
| <b>Obstet<br/>rics<br/>and<br/>gynec<br/>ology</b> | <b>1131</b>       | <b>90</b>   |                  |                  | <b>1</b>    |             | <b>1</b>         |             |             |             |             |             |             |
| <b>total</b>                                       | <b>2386<br/>4</b> | <b>2050</b> | <b>528</b>       | <b>10<br/>2</b>  | <b>20</b>   | <b>21</b>   | <b>20</b>        | <b>4</b>    | <b>0</b>    | <b>0</b>    | <b>1</b>    | <b>1</b>    | <b>0</b>    |
| <b>% of<br/>total</b>                              | <b>89.7<br/>%</b> | <b>7.7%</b> | <b>2.0<br/>%</b> | <b>0.4<br/>%</b> | <b>0.1%</b> | <b>0.1%</b> | <b>0.1<br/>%</b> | <b>0.0%</b> | <b>0.0%</b> | <b>0.0%</b> | <b>0.0%</b> | <b>0.0%</b> | <b>0.0%</b> |

**eTable 2. Types of Industry Largess Received by Residents in all Medical Specialties, 2020 to 2021**

|                     | Count of payments |           |                    |       |                |                                                                                                                                                    |      |                    |           |               |                                         |                                                                                     |                  |
|---------------------|-------------------|-----------|--------------------|-------|----------------|----------------------------------------------------------------------------------------------------------------------------------------------------|------|--------------------|-----------|---------------|-----------------------------------------|-------------------------------------------------------------------------------------|------------------|
| Specialty           | Food and Beverage | Education | Travel and Lodging | Grant | Consulting Fee | Compensation for services other than consulting, including serving as faculty or as a speaker at a venue other than a continuing education program | Gift | Royalty or License | Honoraria | Entertainment | Long term medical supply or device loan | Compensation for serving as faculty or as a speaker for a medical education program | Debt forgiveness |
| Orthopaedic surgery | 5815              | 1675      | 397                | 36    | 7              | 7                                                                                                                                                  |      | 4                  |           |               |                                         | 1                                                                                   |                  |
| Internal medicine   | 7293              | 44        | 11                 | 25    | 1              | 2                                                                                                                                                  | 17   |                    |           |               |                                         |                                                                                     |                  |
| Dermatology         | 5286              | 217       | 1                  |       | 15             | 10                                                                                                                                                 |      |                    |           |               |                                         |                                                                                     |                  |
| Family medicine     | 4631              | 2         | 3                  | 3     | 4              | 3                                                                                                                                                  | 1    |                    |           |               | 1                                       |                                                                                     |                  |

|                                        |      |     |     |    |    |    |   |  |   |   |  |  |  |
|----------------------------------------|------|-----|-----|----|----|----|---|--|---|---|--|--|--|
| Surgery                                | 2858 | 185 | 99  | 18 | 7  | 7  | 1 |  |   |   |  |  |  |
| Psychiatry                             | 2732 | 23  |     |    |    | 2  | 2 |  |   |   |  |  |  |
| Ophthalmology                          | 2129 | 116 | 2   |    | 1  |    |   |  | 1 |   |  |  |  |
| Urology                                | 2136 | 54  | 18  | 20 |    | 2  |   |  |   |   |  |  |  |
| Neurological surgery                   | 1635 | 100 | 218 | 4  | 12 | 6  |   |  | 1 | 1 |  |  |  |
| Neurology                              | 1782 | 12  | 2   | 7  |    | 34 | 2 |  |   |   |  |  |  |
| Obstetrics and gynecology              | 1131 | 90  |     |    | 1  |    | 1 |  |   |   |  |  |  |
| Vascular surgery - integrated          | 1042 | 104 | 30  | 29 |    | 1  | 1 |  |   | 1 |  |  |  |
| Otolaryngology - Head and Neck Surgery | 657  | 70  | 87  |    | 6  | 1  |   |  |   |   |  |  |  |
| Emergency medicine                     | 800  | 7   | 3   | 1  | 3  | 2  | 2 |  |   |   |  |  |  |
| Plastic Surgery - Integrated           | 700  | 63  | 7   |    | 24 | 3  |   |  |   |   |  |  |  |
| Thoracic surgery                       | 490  | 112 | 188 | 1  | 1  |    |   |  |   |   |  |  |  |
| Anesthesiology                         | 649  | 12  | 22  | 12 | 1  |    | 1 |  |   |   |  |  |  |
| Plastic surgery                        | 618  | 44  |     |    | 2  |    |   |  |   |   |  |  |  |
| Allergy and immunology                 | 621  | 1   |     |    |    |    |   |  |   |   |  |  |  |
| Interventional radiology - integrated  | 550  | 31  | 2   | 2  |    | 1  |   |  |   |   |  |  |  |

|                                               |     |    |    |   |   |   |   |  |   |  |   |  |   |
|-----------------------------------------------|-----|----|----|---|---|---|---|--|---|--|---|--|---|
| Physical medicine and rehabilitation          | 470 | 15 | 5  | 4 |   |   |   |  |   |  |   |  |   |
| Radiology-diagnostic                          | 329 | 16 | 2  | 1 | 4 |   |   |  |   |  |   |  |   |
| Thoracic surgery - integrated                 | 283 | 40 | 27 |   |   |   |   |  |   |  |   |  |   |
| Radiation oncology                            | 308 | 3  |    |   | 1 |   |   |  |   |  |   |  |   |
| Pediatrics                                    | 247 | 2  | 1  |   |   |   | 1 |  |   |  | 1 |  | 1 |
| Transitional year                             | 197 | 2  |    |   |   |   | 1 |  |   |  |   |  |   |
| Internal medicine/Pediatrics                  | 184 |    |    |   |   |   |   |  |   |  |   |  |   |
| Colon and rectal surgery                      | 100 | 6  | 42 |   |   |   |   |  |   |  |   |  |   |
| Child neurology                               | 82  | 1  |    | 2 |   | 2 |   |  | 1 |  |   |  |   |
| Occupational and environmental medicine       | 52  |    | 1  |   |   |   |   |  |   |  |   |  |   |
| Pathology-anatomic and clinical               | 43  |    |    |   |   |   |   |  |   |  |   |  |   |
| Public health and general preventive medicine | 36  |    |    |   |   |   |   |  |   |  |   |  |   |
| Osteopathic neuromusculo                      | 27  |    |    |   |   |   |   |  |   |  |   |  |   |

|                                                                                                |    |   |  |  |  |  |  |  |  |  |  |  |  |
|------------------------------------------------------------------------------------------------|----|---|--|--|--|--|--|--|--|--|--|--|--|
| skeletal medicine                                                                              |    |   |  |  |  |  |  |  |  |  |  |  |  |
| Emergency medicine/Family medicine (components individually accredited)                        | 15 |   |  |  |  |  |  |  |  |  |  |  |  |
| Nuclear medicine                                                                               | 2  | 7 |  |  |  |  |  |  |  |  |  |  |  |
| Internal medicine/Psychiatry (components individually accredited)                              | 5  |   |  |  |  |  |  |  |  |  |  |  |  |
| Family medicine/Osteopathic neuromusculoskeletal medicine (components individually accredited) | 3  |   |  |  |  |  |  |  |  |  |  |  |  |
| Internal med/Emer med/Critical care (components individually accredited)                       | 2  |   |  |  |  |  |  |  |  |  |  |  |  |

|                                                                            |       |      |      |      |      |      |      |      |      |      |      |      |      |
|----------------------------------------------------------------------------|-------|------|------|------|------|------|------|------|------|------|------|------|------|
| Internal medicine/Emergency medicine (components individually accredited)  | 2     |      |      |      |      |      |      |      |      |      |      |      |      |
| Internal medicine/Preventive medicine (components individually accredited) | 2     |      |      |      |      |      |      |      |      |      |      |      |      |
| Medical genetics and genomics                                              | 1     |      |      |      |      |      |      |      |      |      |      |      |      |
| Internal medicine/Dermatology (components individually accredited)         |       | 1    |      |      |      |      |      |      |      |      |      |      |      |
| Aerospace medicine                                                         | 1     |      |      |      |      |      |      |      |      |      |      |      |      |
| Column total                                                               | 45946 | 3055 | 1168 | 165  | 90   | 83   | 30   | 4    | 3    | 2    | 2    | 1    | 1    |
| % of total                                                                 | 90.9% | 6.0% | 2.3% | 0.3% | 0.2% | 0.2% | 0.1% | 0.0% | 0.0% | 0.0% | 0.0% | 0.0% | 0.0% |



**eTable 3. Definitions of Payment Types**

| <b>Payment type</b>                                                                                                                                | <b>CMS Definition of Payment Type</b>                                                                                                                                                                                                                                                                                                       |
|----------------------------------------------------------------------------------------------------------------------------------------------------|---------------------------------------------------------------------------------------------------------------------------------------------------------------------------------------------------------------------------------------------------------------------------------------------------------------------------------------------|
| Compensation for services other than consulting, including serving as faculty or as a speaker at a venue other than a continuing education program | Includes payments that a company makes to physicians for speaking, training, and education engagements that are not for continuing education.                                                                                                                                                                                               |
| Compensation for serving as faculty or as a speaker for a medical education program                                                                | Compensation for serving as faculty or as a speaker for an accredited or certified continuing education program. Compensation for serving as faculty or as a speaker for a non-accredited and noncertified continuing education program                                                                                                     |
| Consulting Fee                                                                                                                                     | A payment that a company makes to a physician for advice and expertise about a medical product or treatment. Consulting fees are typically arranged with a written agreement between a company and physician based on the company's particular business needs. These payments often vary depending on the consulting physician's expertise. |
| Debt forgiveness                                                                                                                                   | Forgiving the debt of a covered recipient, a physician owner, or the immediate family of the physician.                                                                                                                                                                                                                                     |
| Education                                                                                                                                          | Payments or transfers of value for classes, activities, programs, or events that involve learning or teaching a profession skill. This payment can include things like textbooks and medical journal articles.                                                                                                                              |
| Entertainment                                                                                                                                      | Attendance at recreational, cultural, sporting or other events that would generally have a cost.                                                                                                                                                                                                                                            |
| Food and Beverage                                                                                                                                  | Food and beverage.                                                                                                                                                                                                                                                                                                                          |

|                                                                                                                                                                 |                                                                                                                                                                                   |
|-----------------------------------------------------------------------------------------------------------------------------------------------------------------|-----------------------------------------------------------------------------------------------------------------------------------------------------------------------------------|
| Gift                                                                                                                                                            | A general category which includes anything a reporting entity provides to a covered recipient that does not fit into another Nature of Payment category.                          |
| Grant                                                                                                                                                           | A payment to a covered recipient to support a specific cause or activity                                                                                                          |
| Honoraria                                                                                                                                                       | Similar to consulting fees, but generally reserved for a brief, one-time activity. Another distinction is that honoraria are generally provided for services without a set price. |
| Long term medical supply or device loan                                                                                                                         | The loan of supplies or a device for a total of 91 days or longer, regardless of whether the loan was 90 consecutive days                                                         |
| Royalty or License                                                                                                                                              | Payments based on sales of products that use a physician's intellectual property.                                                                                                 |
| Travel and Lodging                                                                                                                                              | Any compensation for costs associated with travel, such as hotel fees, airfare, mileage, and cab fare.                                                                            |
| <b>Source:</b> CMS Open Payments website, <a href="https://www.cms.gov/openpayments/natures-of-payment">https://www.cms.gov/openpayments/natures-of-payment</a> |                                                                                                                                                                                   |
| Accessed June 1, 2023.                                                                                                                                          |                                                                                                                                                                                   |
