# Supplementary material for: Industry Payments Received by Residents During Training
Source: PubMed Central journal article supplement (PMC10580108; doi:10.1001/jamanetworkopen.2023.37904), 2023-10-16
Supplement: jamanetwopen-e2337904-s002.pdf [file jamanetwopen-e2337904-s002.pdf]

## Data Sharing Statement

Hogan. Industry Payments Received by Residents During Training. *JAMA Netw Open*.  
Published October 16, 2023. doi:10.1001/jamanetworkopen.2023.37904

### Data

**Data available:** Yes

**Data types:** Deidentified participant data

**How to access data:** Upon request to corresponding author.

**When available:** beginning date: 12-05-2024, end date: 12-30-2026

### Supporting Documents

**Document types:** None

### Additional Information

**Who can access the data:** Qualified researchers.

**Types of analyses:** Validation & replication.

**Mechanisms of data availability:** With signed data use agreement, IRB approval, statement of purpose.

**Any additional restrictions:** Some data (sex, gender) was obtained by a 3rd party. Sharing sex data is subject to the approval of the AAMC.
